# Supplementary material
Source: PubMed Central journal article supplement (PMC4645997)
Supplement: 10.1074_C115.686527_jbc.C115.686527-1.pdf [file 10.1074_C115.686527_jbc.C115.686527-1.pdf]

# SUPPLEMENTAL DATA

## Crystal Structure of the Human Cytomegalovirus pUL50-pUL53 Core Nuclear Egress Complex Provides Insight into a Unique Assembly Scaffold for Virus-Host Protein Interactions

Sascha A. Walzer<sup>‡</sup>, Claudia Egerer-Sieber<sup>‡</sup>, Heinrich Sticht<sup>§</sup>, Madhumati Sevvana<sup>‡</sup>, Katharina Hohl<sup>‡</sup>, Jens Milbradt<sup>¶</sup>, Yves A. Muller<sup>‡1,2</sup> and Manfred Marschall<sup>¶1,2</sup>

From the <sup>‡</sup>Division of Biotechnology, Department of Biology, <sup>§</sup>Division of Bioinformatics, Institute of Biochemistry, <sup>¶</sup>Institute for Clinical and Molecular Virology<sup>3</sup>, Friedrich-Alexander University Erlangen-Nürnberg, Germany

Running title—Crystal Structure of the HCMV Core Nuclear Egress Complex

<sup>1</sup> Both authors contributed equally to this work.

<sup>2</sup> To whom correspondence should be addressed: Yves Muller, Tel.: 49-0-9131-8523082, E-mail: yves.muller@fau.de; Manfred Marschall, Tel.: 49-0-9131-8526089, E-mail: manfred.marschall@viro.med.uni-erlangen.de

### SUPPLEMENTAL FIGURE 1

#### A

##### Homologs of HCMV pUL53

|            |     |                                                             |
|------------|-----|-------------------------------------------------------------|
| HCMV pUL53 | (1) | -----MSSVSGVRTPRERRSALRSLLRKRQRRELASKVASTVNG                |
| HSV-1 UL31 | (1) | -----MYDTPHRRGSRPGPYHGKERRRSRSSAAGGTLGVVRRRA                |
| HSV-2 UL31 | (1) | -----MYDIAPRRSGSRPGPRDKTRRRSRFSAAGNP-GVERRRA                |
| VZV orf27  | (1) | MHLKPTRFFHANQPPMPSYEMEDLCFDDMQYRWSPSNTPYRSMSRRYKSVSRSG-PSMR |
| HHV6A U37  | (1) | -----MTVHKSRIRRSRSLSVTHRIQ-----                             |
| HHV6B U37  | (1) | -----MTVHKSRIRRSRSLSVTHRIQ-----                             |
| HHV7 U37   | (1) | -----MAIQSTRRLRRASSLLKK-----                                |
| EBV BFLF2  | (1) | -----MAPVTPDAVNARQORPADPALRRLMHPHHRNYTASKASAHSVK            |
| HHV8 ORF69 | (1) | -----MPKSVSHISLATSTGRSGPRDIRRCLSSRLRSVPPG                   |
| PrV UL31   | (1) | -----MFERRLLRRK-----                                        |
| MCMV pM53  | (1) | -----MFRSPEGEERDAADREEEGGEARRSRMMSPRRVKRARHRPAGSGLRTPLSR    |

|            |      |                                                          |
|------------|------|----------------------------------------------------------|
| HCMV pUL53 | (40) | A-----TSANNHGEPSPADARPRLLTLD                             |
| HSV-1 UL31 | (40) | S-----RKSLLPPHARKQELCLHERQRYRG                           |
| HSV-2 UL31 | (39) | S-----RKSLLPSHARRLELCLHERRRYRG                           |
| VZV orf27  | (60) | VR-----SRTPCRRQTIRGKLMSKERSVYRH                          |
| HHV6A U37  | (22) | -----KRPDHREKTKLYLQLKLD                                  |
| HHV6B U37  | (22) | -----KRPDHREKTKLYLQLKLD                                  |
| HHV7 U37   | (19) | -----SKPYNKEKTNLSLSLKE                                   |
| EBV BFLF2  | (44) | SVSRCGKS---RSE-----LGRMERVGSVARSICSRHTRHGVDRSHFSLRD      |
| HHV8 ORF69 | (38) | -----ARSASVSSKHRNGLRKFISDKV                              |
| PrV UL31   | (12) | -----SSAARRKTLTRAARDRYAP                                 |
| MCMV pM53  | (55) | PSACRCSSSPERQWQRRRAEKRSTTPDPPPPKRSAAASAAAGAAPESEYLNVLKLE |

|            |      |                                                                                                                                                                                                                                                                                                                                              |
|------------|------|----------------------------------------------------------------------------------------------------------------------------------------------------------------------------------------------------------------------------------------------------------------------------------------------------------------------------------------------|
|            |      | CR1                                                                                                                                                                                                                                                                                                                                          |
|            |      | ##                                                                                                                                                                                                                                                                                                                                           |
| HCMV pUL53 | (64) | LHDI <sup>FR</sup> HE <sup>PE</sup> LE <sup>LE</sup> LK <sup>YL</sup> NM <sup>MA</sup> IT <sup>GK</sup> ES <sup>I</sup> CL <sup>DF</sup> FN <sup>FH</sup> SH <sup>RQ</sup> HT <sup>CL</sup> DI <sup>SP</sup> Y <sup>GN</sup> EQ <sup>VS</sup> RI <sup>ACT</sup>                                                                              |
| HSV-1 UL31 | (64) | LFAALAQT <sup>PE</sup> SEE <sup>IA</sup> IV <sup>RS</sup> LS <sup>SV</sup> PL <sup>VK</sup> TT <sup>PV</sup> SL <sup>EF</sup> CL <sup>DQ</sup> TV <sup>AD</sup> N <sup>CL</sup> TL <sup>SG</sup> MG <sup>YY</sup> LG <sup>IG</sup> GC <sup>CP</sup>                                                                                          |
| HSV-2 UL31 | (63) | FFAALAQT <sup>PE</sup> SEE <sup>IA</sup> IV <sup>RS</sup> LS <sup>SV</sup> PL <sup>VK</sup> TT <sup>PV</sup> SL <sup>EF</sup> SL <sup>DQ</sup> TV <sup>AD</sup> N <sup>CL</sup> TL <sup>SG</sup> MG <sup>YY</sup> LG <sup>IG</sup> GC <sup>CP</sup>                                                                                          |
| VZV orf27  | (86) | YFN <sup>Y</sup> IAR <sup>SP</sup> PE <sup>EL</sup> AT <sup>VR</sup> GL <sup>IV</sup> PI <sup>IK</sup> TT <sup>PV</sup> TL <sup>PF</sup> NL <sup>GQ</sup> TV <sup>AD</sup> N <sup>CL</sup> SL <sup>SG</sup> MG <sup>YH</sup> LG <sup>LG</sup> GY <sup>CP</sup>                                                                               |
| HHV6A U37  | (41) | LHT <sup>V</sup> FN <sup>L</sup> FP <sup>E</sup> YE <sup>Q</sup> K <sup>F</sup> L <sup>AI</sup> IK <sup>L</sup> PI <sup>TG</sup> KE <sup>PI</sup> D <sup>V</sup> EF <sup>S</sup> LS <sup>NH</sup> H <sup>Q</sup> HT <sup>CL</sup> EF <sup>SP</sup> Y <sup>AN</sup> E <sup>Q</sup> IS <sup>K</sup> S <sup>ACL</sup>                           |
| HHV6B U37  | (41) | LHAV <sup>F</sup> N <sup>L</sup> FP <sup>E</sup> YE <sup>Q</sup> K <sup>F</sup> L <sup>AI</sup> IK <sup>L</sup> PI <sup>TG</sup> KE <sup>PI</sup> D <sup>V</sup> EF <sup>S</sup> LS <sup>NH</sup> H <sup>Q</sup> HT <sup>CL</sup> EF <sup>SP</sup> Y <sup>AN</sup> E <sup>Q</sup> IS <sup>K</sup> S <sup>ACL</sup>                           |
| HHV7 U37   | (38) | LHS <sup>V</sup> F <sup>K</sup> LF <sup>PE</sup> Y <sup>E</sup> L <sup>K</sup> FL <sup>NM</sup> M <sup>K</sup> LP <sup>IT</sup> G <sup>K</sup> E <sup>PI</sup> K <sup>IP</sup> FD <sup>LS</sup> L <sup>H</sup> H <sup>Q</sup> HT <sup>CL</sup> DL <sup>SP</sup> Y <sup>AN</sup> E <sup>Q</sup> V <sup>S</sup> K <sup>S</sup> AC <sup>V</sup> |
| EBV BFLF2  | (87) | FFR <sup>G</sup> IS <sup>AN</sup> F <sup>EL</sup> G <sup>K</sup> DF <sup>L</sup> RE <sup>M</sup> NT <sup>PI</sup> H <sup>V</sup> SE <sup>AV</sup> FL <sup>EL</sup> SL <sup>CT</sup> LS <sup>P</sup> GR <sup>CL</sup> RL <sup>SP</sup> FG <sup>HS</sup> SL <sup>T</sup> LG <sup>SH</sup> CE                                                   |

HHV8 ORF69 (60) FFSILSHRHELGVDFLREMETPICTSKTVMLFLDLSTVAPGRQVSLSPFGHSSNMGFQCA  
 PrV UL31 (31) YFAYAAAQPSDEVTTRVGLSNPLIKTAPVTLFFDLGQAVADNCLSLSGMGYYLGLGGCCP  
 MCMV pM53 (115) LHDVFQRHPDLEQKYLKIMKLPITGKESTRLEFFDFKSHRQHTCLDLSPYGNQVRSRACT

CR2

\*  
**HCMV pUL53 (124) S CEDNRI-LPTASDAM-----VAFINQTSNIMKRNRFYFGFC----**  
 HSV-1 UL31 (124) ACNAGDG-RFAATSREA-----LILAFVQQINTIFEHRAFLASLVVLAD  
 HSV-2 UL31 (123) ACSAGDG-RLATVSREA-----LILAFVQQINTIFEHRTFLASLVVLAD  
 VZV orf27 (146) TCTASGEPRLCRTDRAA-----LILAYVQQLNNIYEYRVFLASILALSD  
 HHV6A U37 (101) HCESVS--VPTSSDAM-----VAHLNQVNNVMQNRLYFYGFR----  
 HHV6B U37 (101) HCESVS--VPTSSDAM-----VAHLNQVTNVMQNRFYFYGFR----  
 HHV7 U37 (98) NCGTTN--IPTASDAM-----VAYMNIISNVMQNRLYYFGFQ----  
 EBV BFLF2 (147) ICINRSQ-VHVPQEFSS-----STQLSFFNNVHKIIPNKTFYVSLLS---  
 HHV8 ORF69 (120) LCPSTEN-PTVAQGSRPQTMVGDALKKNNELCSVALAFYHHADKVIQHKTFYLSLS---  
 PrV UL31 (91) TCAAAEP-RLGRSDRAA-----LVLAYVQQLNSIYEYRVFLASVAAR--  
 MCMV pM53 (175) TCKETTR-LPTASDSM-----VAFINQTSNVMKHKRFYFGFR----

CR2

CR3

**HCMV pUL53 (160) -----KSSELLKLTSTNQPIFQIYYLLHAANHDIVPFMHAE----DGRLLMHVIFENP**  
 HSV-1 UL31 (167) RH---NAPLQDLLAGILGQPELFFVHTILRGGGACDPRLLFYDP-PTYGGHMLYVIFPGT  
 HSV-2 UL31 (166) RH---STPLQDLLADTLGQPELFFVHTILRGGGACDPRFLFYDP-PTYGGHMLYVIFPGT  
 VZV orf27 (190) RANMQAASAEPLSSVLAQPELFFMYHIMREGGMRDIRVLFYRDG-DAGGFMYVIFPGK  
 HHV6A U37 (136) -----KDMELIRMSAKQPTIFQIFYIVHNTINNIFPIMFER----KQKLGMHIVFQSR  
 HHV6B U37 (136) -----KDMELIRMSAKQPTIFQIFYIVHNTINNIFPIMFEK----KQKLGMHIVFQSR  
 HHV7 U37 (133) -----KQVELIRMSAKQPTLQIFYILSSIASNFLPIMFEN----NEKLNMYVVFQTR  
 EBV BFLF2 (187) -----SSPSAVKAGLSQPSLLYAYLVTGHFCGTICPIFSTNG---KGRLLIMHLLLQGT  
 HHV8 ORF69 (176) -----HSMDEVVRQSFLQPEGLLYANLVKTFGHDPLPIFTTN---NGMLTMCILFKTR  
 PrV UL31 (132) -----DPSERALEEVLHPELFFAYYVLRDGLRDRVRLVFEEDPAQGALMMYVVFPEK  
 MCMV pM53 (211) -----KNMELLKMAANQQLFQIYYIVQSCVQEIYVPLIYYD----REMAHMQLIFEKE

CR3

CR4

\*  
**HCMV pUL53 (209) DVHIPCDCITQMLTAAREDYSVTLNIVRDHVVISVLCHAVSA---SSVKIDVTILQRKID**  
 HSV-1 UL31 (223) SAHLHYRLIDRMLTAC-PGGRFVAHVWQSTFVLVRRNAEKPTDAEIPVSAADIYCKMR  
 HSV-2 UL31 (222) SAHLHYRLIDRMLTAC-PGGRFVAHVWQSTFVLVRRNAEKPADAEIPTVSAADIYCKMR  
 VZV orf27 (249) SVHLHYRLIDHIQAAC-RGPKIVAHVWQTFLLSVCRNPEQQTETVVPSTGTSVDYCKMC  
 HHV6A U37 (185) TLHIPCCEIKQIVAVS-SGMNVYLDILQESVILTVLCETLDTN--TNIHIDIGMLQKKLE  
 HHV6B U37 (185) TLHIPCCEIKQIIAVS-SGMNVYLDILQDSVILTVLCETLDTN--TNIHIDIGMLQKKLE  
 HHV7 U37 (182) TLHIPCCEINQIMTVS-SGTVLLDILHDSIVLVHVLCKTLET---SNIQIDINVLQRKIE  
 EBV BFLF2 (237) SLHIPETCLKLLCENIGPTVELAVDLVGDFAFCIKVSPRDTVYE--KAVNVDEDAIYEAIK  
 HHV8 ORF69 (225) ALHLGETALRLLMDNL-PNYKISADCCRSYVVKFVPTHPTD---ASIAVQVHTICEAVA  
 PrV UL31 (186) SVVHHRVLDRLGAC-AGHRIVAHVWQTMFVLVVRKKGDGRPADDPVAVSADIYCKMR  
 MCMV pM53 (260) TVHIPSQCTEQILTVAKDAVGVSLDIAHQRIITLTARCLRLES---SSLRIDVLMQRKVD

CR4

**HCMV pUL53 (266) EMDIPNDVSESFERYKELIQELCQSSGNNLYEEATSSYAIRSPLTASPLHVSTNGCGPS**  
 HSV-1 UL31 (282) DISFDGGLMLEYQRLYATFDEFPPP-----  
 HSV-2 UL31 (281) DISFDGGLMLEYQRLYATFDEFPPP-----  
 VZV orf27 (308) DLNFDGELLEYKRLYALFDDFVPPR-----  
 HHV6A U37 (242) EMDIPNEISDRLEKYKGHLIGFH-----  
 HHV6B U37 (242) EMDIPNEISDRLEKYKGHLIGFH-----  
 HHV7 U37 (238) EMDVPDEIGDKFEKCLKHILPFI-----  
 EBV BFLF2 (295) DLECGDELRLQIINYTQLILENKQ-----  
 HHV8 ORF69 (281) ALDCTDEMRDDIQKGTALVNAL-----  
 PrV UL31 (245) DISFDGELLEYKRLYALFDEFPRPP-----  
 MCMV pM53 (317) ELEIPNETNEKFEYSYSL-----

**HCMV pUL53 (326) SSSQSTPPHLHPPSQATQPHHYSHHQSSQSQHHHRPQSPPPPLFLNSIRAP**  
 HSV-1 UL31 (307) -----  
 HSV-2 UL31 (306) -----  
 VZV orf27 (334) -----  
 HHV6A U37 (265) -----  
 HHV6B U37 (265) -----  
 HHV7 U37 (260) -----  
 EBV BFLF2 (319) -----  
 HHV8 ORF69 (303) -----  
 PrV UL31 (272) -----  
 MCMV pM53 (334) -----

## B

### Homologs of HCMV pUL50

CR1

|                   |     |                                                              |
|-------------------|-----|--------------------------------------------------------------|
|                   |     | # #                                                          |
| <b>HCMV pUL50</b> | (1) | -----MEMNKVLHQD LVQATRRILKLG---PSELRVTD-AG-LICKNPNYSVCDAML   |
| HSV-1 UL34        | (1) | MAGLGKPYTGHPGDAFEG LVQRIRLIVPST-----LRGGDGEAGPYSPSSLPSCAFQF  |
| HSV-2 UL34        | (1) | MAGMGKPYGGRPGDAFEG LVQRIRLIVPAT-----LRGGGEGSPYSPSNPPSRAAFQF  |
| VZV orf24         | (1) | MSRRTYVRSERRRGCODN LLQRIRLVVPSA-----LQCCDGLDLPFDPPQPPARCVFQF |
| HHV6A U34         | (1) | -----MANVLKEKMYDE LLSATCRILKLG---SHDYRITE-RN-LLSKNPKFPLCDIIL |
| HHV6B U34         | (1) | -----MANVLKEKMYDE LLSATCRILKLG---SHDYRMTE-RN-LLSKNPKFPLCDIIL |
| HHV7 U34          | (1) | -----MLKEKMYDE LLLSTCRVLKLG---PADFRVTD-KN-LFSKNPKFPLCDILL    |
| EBV BFRF1         | (1) | -----MASPEERLLDE LNNVIVSFLCDSG-SLEVERCSG-AH-VFSRGSSQPLCTVKL  |
| HHV8 ORF67        | (1) | -----MSVVGKRVVDE LCRVSSYLQSGQSLDLERCIDGAP-VYAKGGATAICTVRM    |
| PrV UL34          | (1) | -----MSGTLVQRKLKILSGG-----NLRCSGGET-ACDPERPPTRCVFQV          |
| MCMV pM50         | (1) | -----MEIDKNVGAD LISNTRRILRLD---ENELRITD-TA-LICKNPNYSLCDAML   |

|                   |      |                                |                                    |                                  |
|-------------------|------|--------------------------------|------------------------------------|----------------------------------|
|                   |      | CR1                            | # # # #                            | CR2                              |
| <b>HCMV pUL50</b> | (48) | K----                          | TDTVYCV EYLLSYWESRTD----           | HVPCFIFKNTGCAVSLCCFVRAPVKLVSPAR  |
| HSV-1 UL34        | (55) | HGHDGSDSEFP I EYVLRMLMNDWAEV P | ---                                | CNPYLRIQNTGVSVLFQGGFFHRPHNAPG-GA |
| HSV-2 UL34        | (55) | HGQDGSDEAFPI EYVLRMLMNDWADV P  | ---                                | CNPYLRVQNTGVSVLFQGGFFNRHGAPG-GA  |
| VZV orf24         | (55) | NGEDNVSEAFPVE YIMRLMANWAQVD    | ---                                | CDPYIKIQNTGVSVLFQGGFFRPTNAPV-AE  |
| HHV6A U34         | (50) | K----                          | LDYAYNLE YLLSLWEHVTK----           | QEPRFVFKNTGGAVSMSCYLHAPVKVEG-HH  |
| HHV6B U34         | (50) | K----                          | LDYAYNLE YLLSLWEHVTK----           | QEPRFVFKNTGGAVSMSCYLHAPVKAEG-HH  |
| HHV7 U34          | (47) | K----                          | LDYAYNLE YLLSLWEHVTK----           | QEPRFVFKNTGGAVSMSCYLHAPVKVEG-HH  |
| EBV BFRF1         | (51) | R----                          | HGQIYHLE FVYKFLAFKLNKCNYPSSPVFVISN | NGLATTLRCLFHEP SGLRSGQS          |
| HHV8 ORF67        | (53) | Q----                          | HGCVYHLE FVYKFLAFKLNKCNYPSSPVFVISN | NGLSTTLKCFLCRPSDAVSQFG           |
| PrV UL34          | (41) | HGQDGSNDTFPLE YVLRMLMSWAHVP    | ---                                | CDPYVRVQNTGVSVLFQGGFFRPADAPL-AA  |
| MCMV pM50         | (48) | T----                          | TDIVYVPE YLLSYWECRSG----           | RTACFVFKNTGCRVLSLCYIGFERLKD-LK   |

|                   |       |                              |          |                              |     |   |
|-------------------|-------|------------------------------|----------|------------------------------|-----|---|
|                   |       | # #                          | CR2      | # # # #                      | # # | # |
| <b>HCMV pUL50</b> | (99)  | HVGE-FNV-LKVNESLIVTLKDI EEIK | -----    | PSAYGVLTKCVVRKSN SASVFNIEL   |     |   |
| HSV-1 UL34        | (111) | ITPERTNVILGSTETTGLSLGDLDTIK  | GRLGLDAR | PMMASMWISCFV RMPRVQLAFRFMG   |     |   |
| HSV-2 UL34        | (111) | ITAEQTNVILHSTETTGLSLGDLDDVY  | GRLGLDAR | PMMASMWISCFV RMPRVQLAFRFMG   |     |   |
| VZV orf24         | (111) | VSIDSNNVILSSTLSTGINLSALESIK  | RGGGIDRR | PLQALMWVNCFV RMPYVQLSFRFMG   |     |   |
| HHV6A U34         | (100) | AVRE-CN-ILRVNECLTVRMSDI VAMK | -----    | PSTFAVFTKCI IRR-NRDTYVVEF    |     |   |
| HHV6B U34         | (100) | AVRE-CN-ILRVNECLTVRMSDI VAMK | -----    | PSTFAVFTKCI IRR-NRDTYVVEF    |     |   |
| HHV7 U34          | (97)  | IVKE-CN-ILNVNECLSVCLNDIEAIK  | -----    | PSSSGVLTCKI IRR-NRDAAFIVEF   |     |   |
| EBV BFRF1         | (107) | GPCLGLSTDVDLPKNSIIMLGQDDFIK  | FKSPLVFP | PAELDLLKSMVVC RAYITHEHRTTMQF |     |   |
| HHV8 ORF67        | (109) | HVLPVESDVYLAKNTSVVLGQDDFTK   | FKASLVF  | SKNLGVYNSMVIC RTYFTYRQVLQF   |     |   |
| PrV UL34          | (97)  | ITAEHNNVILASTHSTGMSLSALDDIK  | RAGGVDTR | PLRAMMSVSCFV RMPRVQLSFRFMG   |     |   |
| MCMV pM50         | (98)  | RVCD-FNF-LSVNEALVVTLADIERIK  | -----    | PCDKGVLTCVVRKSN SGMSYNI E V  |     |   |

|                   |       |                                |                                    |         |
|-------------------|-------|--------------------------------|------------------------------------|---------|
|                   |       | # # # # #                      | CR2                                | # # # # |
| <b>HCMV pUL50</b> | (149) | IAFGPENEGEYENLLRELYAKKAAS      | TLAVRNHVTVSSHSGSGPSLWRARMSAALTRTAG |         |
| HSV-1 UL34        | (171) | PEDAGRTRRILCRAAEQAITRRR        | -----R-TRRSR                       |         |
| HSV-2 UL34        | (171) | PEDAVRTRRILCRAAEQALARRR        | -----SRRSQ                         |         |
| VZV orf24         | (171) | PEDPSRTIKLMARATDAYMYKET        | -----GNNL                          |         |
| HHV6A U34         | (149) | VAFGPENESEYISLLKAIFLKCKSMGQHLE | -----SNRFCQGLR                     |         |
| HHV6B U34         | (149) | VAFGPENESEYISLLKAIFLKCKSMGQHLE | -----SNRFCQGLR                     |         |
| HHV7 U34          | (146) | VAFGPENESEYIALLKAIILKCKFLER    | -----SQDLE                         |         |
| EBV BFRF1         | (167) | LVEQAANAQKASRVMDMISDMSQQLSR    | -----GQVE                          |         |
| HHV8 ORF67        | (168) | LVVTPKSHKRLKSLLETVYCLAAPVAD    | -----                              |         |
| PrV UL34          | (157) | PDDASQTQRLLDRAEMRQRSVSR        | -----PGG--                         |         |
| MCMV pM50         | (148) | VAFGPDNEAEYQALLRDIYARRMST      | -----VPTDCGSLI                     |         |

|                   |       |                                                            |
|-------------------|-------|------------------------------------------------------------|
| <b>HCMV pUL50</b> | (209) | KRSSRTASPPPPRRHPSCSPTMVAAGGAAAGPRPPPPMAAGSWRLCRCEACMGRCCAS |
| HSV-1 UL34        | (200) | EAYGAEAGLVAGTG-----                                        |
| HSV-2 UL34        | (200) | DDYGAVVVA AHHS-----                                        |
| VZV orf24         | (198) | DEYIRWRPSFRSPP-----                                        |
| HHV6A U34         | (189) | RRSSHVLEKGRFES-----                                        |
| HHV6B U34         | (189) | RRSSHVLEKQQLGS-----                                        |
| HHV7 U34          | (177) | KHRAARHIKKPLRL-----                                        |
| EBV BFRF1         | (199) | DTGARVTGGGGRP-----GVTHSGCLGD SHVR-----G                    |
| HHV8 ORF67        | (195) | --SAAQGGAGFPTN-----                                        |

```

PrV UL34 (183) GAGGGDDGEGPSPR-----
MCMV pM50 (182) CRRARCLAAAPRR-----PPPPPPPGQRWGLRKHGPNLRRYAG

HCMV pUL50 (269) EGDADDEEEELLAGEGKAAAAAGQDVGGSARRPLEEHVSRRRGVSTHHRHPPSPPCA
HSV-1 UL34 (215) -----FRARGDGFGLPLLLTQGPSR-----
HSV-2 UL34 (214) -----SGAPGPGVAASGPPAPPGRG-----
VZV orf24 (212) -----ENGSPTSVQMOSDIKPA-----
HHV6A U34 (203) -----SGK-----VVNKASAVVTSQESIKQFYEK-----EK---
HHV6B U34 (203) -----SGE-----IANKASAVVTSQESINQFYEK-----EK---
HHV7 U34 (191) -----QLKSVGEMTSFRSINYMGN-----KD---
EBV BFRF1 (228) RGG--WDLDNFSEAETEDASYAPWRDKDSWSESE-----AAPWK
HHV8 ORF67 (207) -----GRDARACTSDVTAVYWAGQG-----
PrV UL34 (197) -----APIRPTVISFPVPGHAAAFVQQAAYP-----
MCMV pM50 (223) GGGAAKNQPAASPTSTSTSSPAAPSRDQDQTRPP-----PAGDTN

HCMV pUL50 (329) PSLERTGYRWAPSSWWRARSGPSRPQSGPWLPARFATLGPLVLALLLVALLWRGHGQSS
HSV-1 UL34 (235) -----PWHQALRGLKHLRIG-----PPALVLAAGLVLGAAIWWVVGAGARL-
HSV-2 UL34 (234) -----PARPWHQAVQLFRAPRPG-----PPALLLLAAGLFLGAAIWWAVGARL-
VZV orf24 (230) -----LPDTQTTRVWKLALPVAN-----VTYALFIVIVLVVVLGAVLFWK-----
HHV6A U34 (229) -----SLLSGVKFWRLSER-----HCRFALVGICFLLALYFCYVLLKKTPTPA
HHV6B U34 (229) -----SFLSGVKFSRLSER-----HCRVAIVSICFLLALYFCYVLLKKTPTPA
HHV7 U34 (213) -----AAVFPVTVPIFARRNN-----ILCGFLVAALLIVCYVIFKEFALSA
EBV BFRF1 (266) KELVLRHPIRRHRTRRETRMRGSHSRVEHVPPETRETVVGGAWRYSWRATPYLARVLAVTA
HHV8 ORF67 (227) -----GRTVRILG-----AFQWSLGRAVALVRRSWPWI SAGIAFLC
PrV UL34 (223) -----PPARFPASLLHTLLG-----LR-RLAGYAVACVTGALAIVILNMR--
MCMV pM50 (265) VTAAETTYSSERTISFLTRHAN-----AIHCALILAAIALVLLWLLYWHAAARSAG

HCMV pUL50 (389) SPTRSAHRD--
HSV-1 UL34 (276) -----
HSV-2 UL34 (277) -----
VZV orf24 (270) -----
HHV6A U34 (272) SGSVV-----
HHV6B U34 (272) SGPVV-----
HHV7 U34 (254) DFSAV-----
EBV BFRF1 (326) VALLLMFLRWT
HHV8 ORF67 (263) LGLVWMRPS--
PrV UL34 (263) -----
MCMV pM50 (315) HP-----

```

**SUPPLEMENTAL FIGURE 1. Protein sequence alignment of pUL50 and pUL53 homologs.** Using the ClustalW algorithm (33) by AlignX (component of Vector NTI Advance 9.1.0; Invitrogen), multiple alignments of the full amino acid sequences of pUL53 (A) and pUL50 (B) homologs of human herpesviruses (herpes simplex virus types 1 and 2, HSV-1/-2; varicella zoster virus, VZV; human cytomegalovirus, HCMV; human herpesvirus 6 variants A and B, HHV-6A/B; human herpesvirus 7, HHV-7; Epstein-Barr virus, EBV; and human herpesvirus 8, HHV-8/KSHV) and animal herpesviruses (pseudorabies virus, PrV and murine cytomegalovirus, MCMV) were performed. The sequences were selected from the UniProt Knowledgebase (<http://www.uniprot.org/>):

*pUL53 homologs* – UL31 of HSV-1 strain 17 (accession number P10215), UL31 of HSV-2 strain HG52 (P89454), ORF27 of VZV strain Dumas (P09283), pUL53 of HCMV strain AD169 (P16794), U37 of HHV-6A strain Uganda (P28865), U37 of HHV-6B strain HST (Q9WT27), U37 of HHV-7 strain JI (P52361), BFLF2 of EBV strain B95-8 (P0CK47), ORF67 of HHV-8 strain GK18 (F5H982), UL34 of PrV strain Kaplan (Q911V7), and pM53 of MCMV (H2A291).

*pUL50 homologs* – UL34 of HSV-1 strain 17 (P10218), UL34 of HSV-2 strain HG52 (P89457), ORF24 of VZV strain Dumas (P09280), pUL50 of HCMV strain AD169 (P16791), U34 of HHV-6A strain Uganda (P52465), U34 of HHV-6B strain Z29 (Q9QJ35), U34 of HHV-7 strain JI (P52466), BFRF1 of EBV strain B95-8 (P03185), ORF67 of HHV-8 strain GK18 (Q76RF3), UL34 of PrV strain Kaplan (Q9ICS7), and pM50 of MCMV (H2A365).

Alignment coloring scheme: red on yellow, identical residues throughout all analyzed sequences; black on green, identical residues in all sequences of human herpesviruses; black on cyan, identical residues in all sequences of betaherpesviruses (HCMV, HHV-6A/B, HHV-7, and MCMV). The previously identified conserved regions within homologs of pUL53 (CR1 to CR4) and pUL50 (CR1 and CR2) (14, 34) are depicted on top of the sequence alignments as black bars. Residues of pUL50 and pUL53 which interact with the respective binding partner are marked by #; residues of pUL53 which constitute a zinc finger are marked by \*. Note, that almost all residues of the interaction surface are located within the conserved regions (pUL53, CR1; pUL50, CR1 and CR2) and that the residues of the zinc finger (Cys106, Cys122, Cys125, His211) are strictly conserved among homologous sequences of pUL53.
